# Supplementary material for: Preparation of (Zn1+xGe)(N2Ox) nanoparticles with enhanced NOx decomposition activity under visible light irradiation by nitridation of Zn2GeO4 nanoparticles designed precisely
Source: Royal Society of Chemistry journal article supplement (doi:10.1039/c9nr05244e), 2019-01-01
Supplement: c9nr05244e1.pdf [file c9nr05244e1.pdf]

## **Electronic Supplementary Information**

**Preparation of  $(\text{Zn}_{1+x}\text{Ge})(\text{N}_2\text{O}_x)$  nanoparticles with enhanced  $\text{NO}_x$  decomposition activity under visible light irradiation by nitridation of  $\text{Zn}_2\text{GeO}_4$  nanoparticles designed precisely**

Jingwen Wang, Yusuke Asakura,\* Shu Yin

Institute of Multidisciplinary Research for Advanced Materials

Tohoku University, 2-1-1 Katahira, Aoba-ku, Sendai 980-8577, Japan

E-mail: asa@tohoku.ac.jp

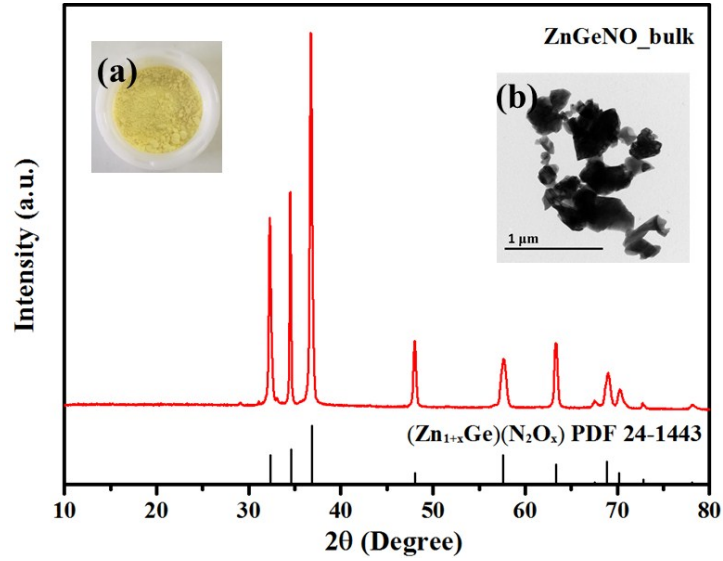

**Fig. S1** XRD pattern of  $(\text{Zn}_{1+x}\text{Ge})(\text{N}_2\text{O}_x)$  synthesized by nitridation of a mixture containing  $\text{ZnO}$  and  $\text{GeO}_2$  ( $\text{ZnGeNO\_bulk}$ ) (insets: (a) appearance and (b) TEM image of  $\text{ZnGeNO\_bulk}$ ).

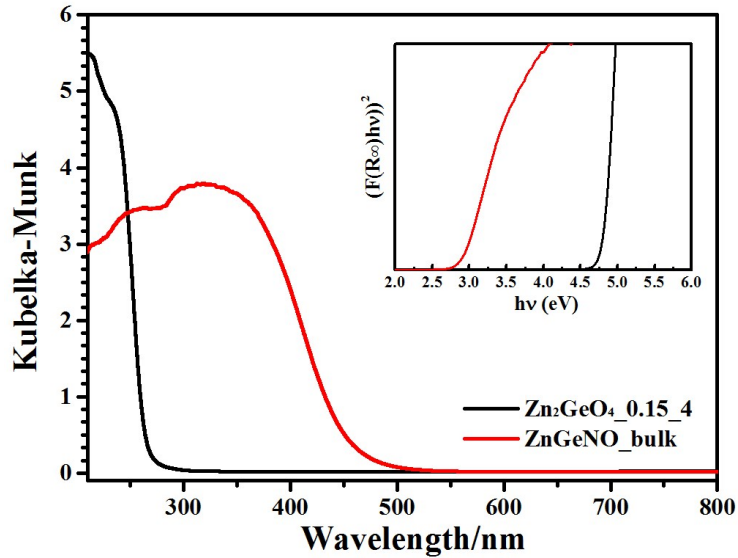

**Fig. S2** UV/Vis diffuse reflectance spectra of  $\text{Zn}_2\text{GeO}_4_{0.15_4}$  and  $\text{ZnGeNO\_bulk}$  (inset: plots of  $(F(R_\infty)hv)^2$  versus  $(hv)$  for obtaining the band gaps of above samples).

The band gap energy ( $E_g$ ) of each sample was estimated based on the theory of optical absorption with following equation (1) proposed by Tauc, Davis, and Mott:

$$(\alpha hv)^{1/n} = A(hv - E_g) \quad (1)$$

where  $A$ ,  $h$ ,  $v$  and  $E_g$  are a proportional constant, the Plank constant, the frequency of vibration( $1/\lambda$ ) and the band gap, respectively. The value of the exponent  $n$  is either

1/2 for a direct allowed transition or 2 for an indirect allowed transition. Since both  $(\text{Zn}_{1+x}\text{Ge})(\text{N}_2\text{O}_x)$  and  $\text{Zn}_2\text{GeO}_4$  exhibit direct allowed transitions, and  $n = 1/2$  is used for these samples.  $F(R_\infty)$  is proportional to the value of the absorption coefficient  $\alpha$ , therefore the  $\alpha$  in the Tauc equation is substituted by  $F(R_\infty)$  with Kubelka-Munk function for estimation of the optical absorption edge energy. So, the above relational expression becomes:

$$(F(R_\infty)hv)^2 = A(hv - E_g) \quad (2)$$

Thus, the curve that plots the value of  $(hv - (F(R_\infty)hv)^2)$  on the horizontal axis  $hv$  and vertical axis  $(F(R_\infty)hv)^2$  is drawn. By the extrapolation of the straight portion of the plot of  $(F(R_\infty)hv)^2$  versus  $(hv)$  to the  $F(R_\infty) = 0$  point, the  $E_g$  values of the prepared samples can be estimated. The band gaps of  $\text{Zn}_2\text{GeO}_4_{0.15\_4}$  and  $\text{ZnGeNO\_bulk}$  are estimated to be 4.8 eV and 2.8 eV, respectively.

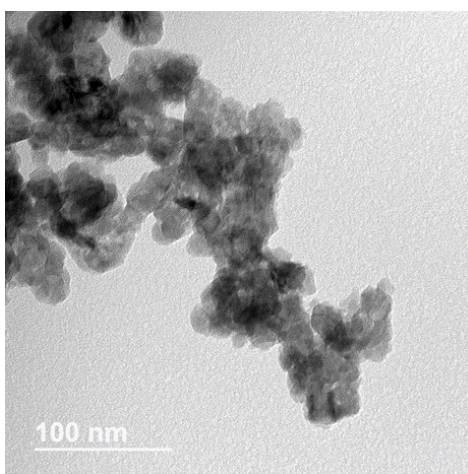

**Fig. S3** High magnification TEM image of  $\text{ZnGeNO}_4_{0.15\_4}$  sample.

**Table S1.** The abbreviated names of  $(\text{Zn}_{1+x}\text{Ge})(\text{N}_2\text{O}_x)$  samples nitrated for 1 h and the corresponding precursors synthesized with different volume of TEA.

| Sample<br>( $\text{ZnGeNO}_X_1$ ) <sup>a</sup> | Precursor<br>( $\text{Zn}_2\text{GeO}_4\_A\_B$ ) <sup>b</sup> | Volume of<br>TEA (mL) | Specific surface<br>area ( $\text{m}^2/\text{g}$ ) |
|------------------------------------------------|---------------------------------------------------------------|-----------------------|----------------------------------------------------|
| $\text{ZnGeNO}_0_1$                            | $\text{Zn}_2\text{GeO}_4\_0.15\_0$                            | 0                     | 20.1                                               |
| $\text{ZnGeNO}_2_1$                            | $\text{Zn}_2\text{GeO}_4\_0.15\_2$                            | 2                     | 35.5                                               |
| $\text{ZnGeNO}_4_1$                            | $\text{Zn}_2\text{GeO}_4\_0.15\_4$                            | 4                     | 39.7                                               |
| $\text{ZnGeNO}_6_1$                            | $\text{Zn}_2\text{GeO}_4\_0.15\_6$                            | 6                     | 29.4                                               |
| $\text{ZnGeNO}_8_1$                            | $\text{Zn}_2\text{GeO}_4\_0.15\_8$                            | 8                     | 25.7                                               |

<sup>a</sup>  $\text{ZnGeON}_X_1$ : X is the volume of TEA used in the preparation of  $\text{Zn}_2\text{GeO}_4$  precursors during solvothermal reaction; 1: 1 h nitridation; <sup>b</sup>  $\text{Zn}_2\text{GeO}_4\_A\_B$ : A is the molar concentration of  $\text{Zn}(\text{NO}_3)_2 \cdot 6\text{H}_2\text{O}$  and  $\text{Na}_2\text{GeO}_3$ ; B is the volume of TEA (mL).

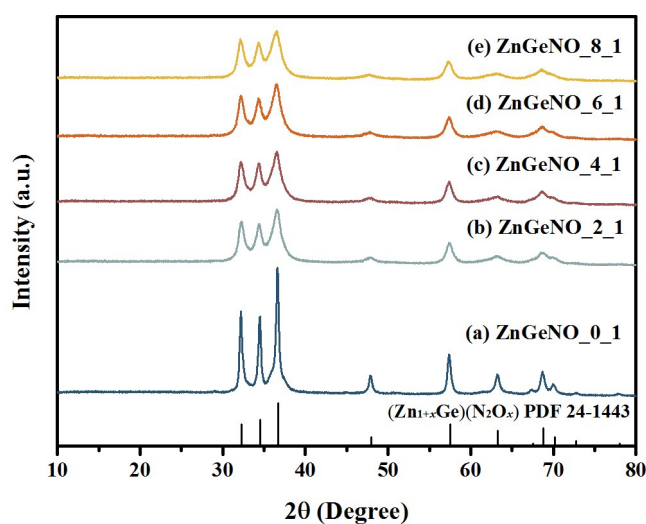

**Fig. S4** XRD patterns of  $(\text{Zn}_{1+x}\text{Ge})(\text{N}_2\text{O}_x)$  samples nitrated for 1 h with different TEA volume: (a)  $\text{ZnGeNO}_0_1$ , (b)  $\text{ZnGeNO}_2_1$ , (c)  $\text{ZnGeNO}_4_1$ , (c)  $\text{ZnGeNO}_6_1$  and (d)  $\text{ZnGeNO}_8_1$ .

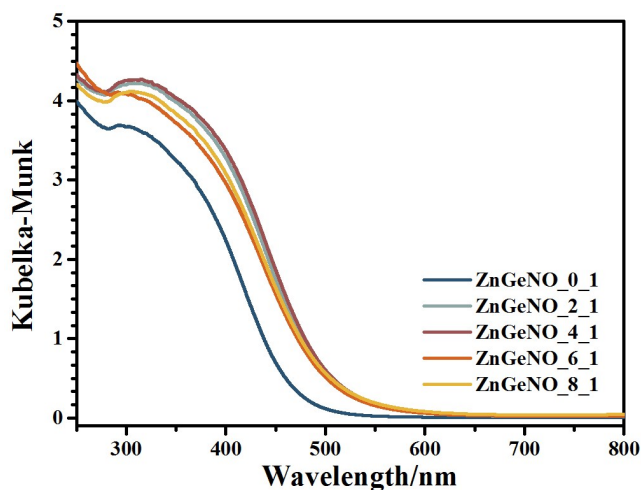

**Fig. S5** UV/Vis diffuse reflectance spectra of ZnGeON\_X\_1 (X: 0, 2, 4, 6 or 8 mL of TEA used in the preparation of Zn<sub>2</sub>GeO<sub>4</sub> precursors during solvothermal reaction; 1: 1 h nitridation).

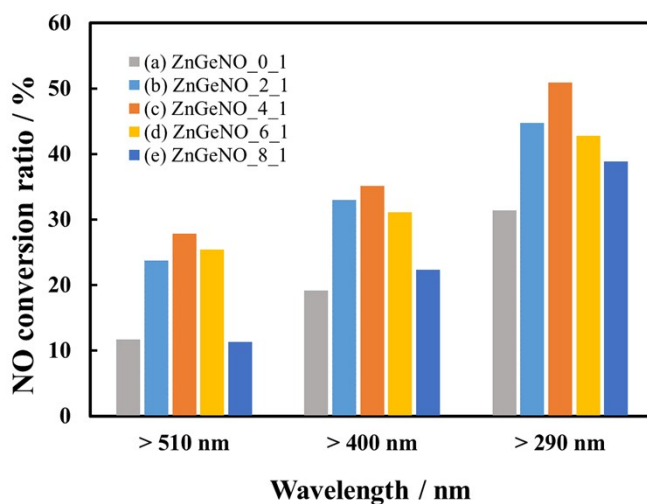

**Fig. S6** Conversion ratios of photocatalytic NO<sub>x</sub> decomposition activity under irradiation above 510, 400 and 290 nm using different photocatalysts: (a) ZnGeNO\_0\_1, (b) ZnGeNO\_2\_1, (c) ZnGeNO\_4\_1, (d) ZnGeNO\_6\_1 and (e) ZnGeNO\_8\_1.

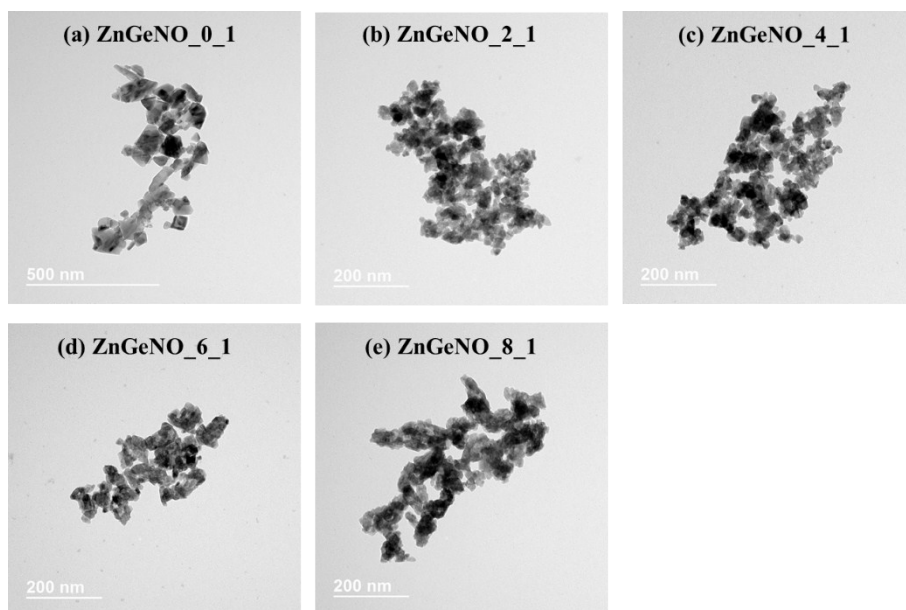

**Fig. S7** TEM images of  $(\text{Zn}_{1+x}\text{Ge})(\text{N}_2\text{O}_x)$  samples synthesized by nitridation for 1 h of  $\text{Zn}_2\text{GeO}_4$  synthesized under a presence of different volumes of TEA (0, 2, 4, 6 and 8 mL): (a) ZnGeNO\_0\_1, (b) ZnGeNO\_2\_1, (c) ZnGeNO\_4\_1, (d) ZnGeNO\_6\_1 and (e) ZnGeNO\_8\_1.

The photocatalytic  $\text{NO}_x$  decomposition activity of  $(\text{Zn}_{1+x}\text{Ge})(\text{N}_2\text{O}_x)$  obtained by nitridation of different precursors for 1 h are shown in Fig. S6 (referred as ZnGeNO\_X\_1: X means the volume of TEA (mL) used in solvothermal reaction for the synthesis of  $\text{Zn}_2\text{GeO}_4$ ; 1 means nitridation of 1 h). The precursors are synthesized with different TEA volume under same hydrothermal conditions (100 °C, 12 h). The photocatalytic activity increased at first and decreased subsequently with increase of TEA additive due to the alteration of particle sizes (Fig. S7). As shown in Fig. 9 and Fig. S6, ZnGeNO\_4\_1 possessed the best performance on photocatalytic  $\text{NO}_x$  decomposition activity among all samples. These results indicate that the amount of TEA is critical for morphology control as well as the enhancement of photocatalytic  $\text{NO}_x$  decomposition activity.

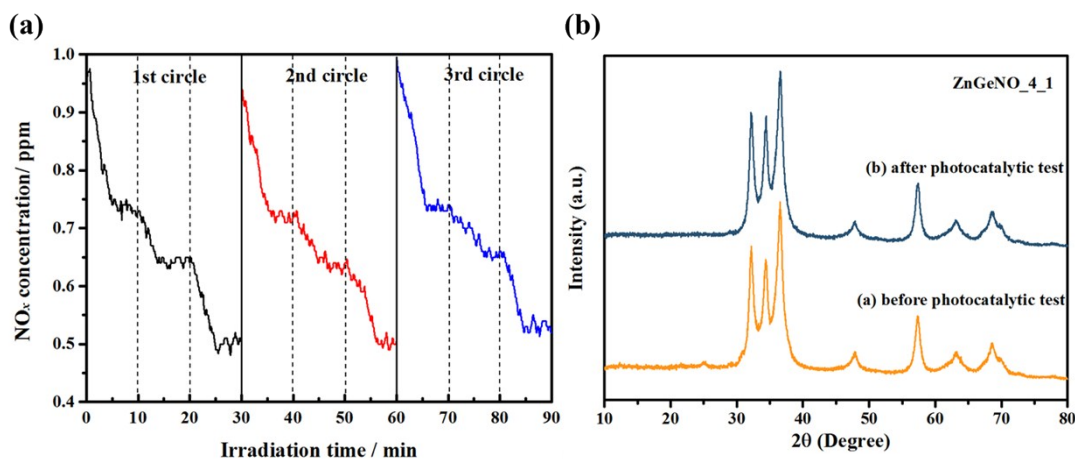

**Fig. S8** (a) The three cycles of deNO<sub>x</sub> ability of ZnGeNO<sub>4</sub>\_1 and (b) XRD patterns of ZnGeNO<sub>4</sub>\_1 sample before and after photocatalytic NO<sub>x</sub> decomposition test.

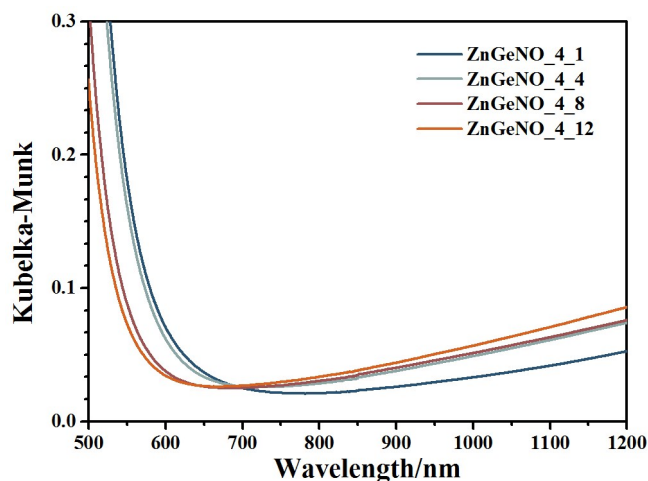

**Fig. S9** The magnified UV-vis diffuse reflectance absorption spectra of (Zn<sub>1+x</sub>Ge)(N<sub>2</sub>O<sub>x</sub>) samples with different nitridation time.

In the photocatalytic test, the wavelength of Hg lamp was cut by filters, and the samples were irradiated under a range of wavelength. Therefore, the calculated apparent quantum efficiencies are photon conversion between a range of wavelength. In this research, the apparent quantum efficiency (AQE) under irradiation of various light wavelength was calculated according to the following equation according to our previous report<sup>1</sup>:

$$AQE(\%) = \frac{F_{NO} \cdot \alpha_{\lambda}}{P_{\lambda} \cdot S} \times 100\%$$

$F_{\text{NO}}$ : the flow quantity of NO molecules in the reaction gas ((1 ppm, 200 ml/min,  $1.488 \times 10^{-4} \mu\text{mol s}^{-1}$ );

$\alpha_{\lambda}$ : the photocatalytic  $\text{NO}_x$  decomposition ability;

$P_{\lambda}$ : the light intensity on the surface of the sample ( $\mu\text{mol m}^{-2} \text{s}^{-1}$ ) and the different light intensity are shown in 2.5 section.

S: the surface area of the samples (20 mm  $\times$  16 mm) ( $\text{m}^2$ );

**Table. S2** The AQE (%) of samples prepared by different conditions in various wavelength ranges.

| Sample      | AQE (%)    |            |         |
|-------------|------------|------------|---------|
|             | 290-400 nm | 400-510 nm | >510 nm |
| ZnGeNO_4_1  | 0.49       | 0.04       | 0.05    |
| ZnGeNO_4_4  | 0.69       | 0.04       | 0.02    |
| ZnGeNO_4_8  | 0.74       | 0.05       | 0.004   |
| ZnGeNO_4_12 | 0.74       | 0.03       | 0.007   |
| ZnGeNO_0_1  | 0.38       | 0.04       | 0.02    |
| ZnGeNO_2_1  | 0.36       | 0.05       | 0.04    |
| ZnGeNO_6_1  | 0.36       | 0.03       | 0.04    |
| ZnGeNO_8_1  | 0.51       | 0.05       | 0.02    |
| ZnGeNO_bulk | 0.71       | 0.04       | 0.005   |

## Reference

1. S. Yin, B. Liu, P. Zhang, T. Morikawa, K.-i. Yamanaka and T. Sato, *J. Phys. Chem. C*, 2008, **112**, 12425-12431.
